# Supplementary material for: Differences in HIV-1 reservoir size, landscape characteristics, and decay dynamics in acute and chronic treated HIV-1 Clade C infection
Source: eLife. 2025 Feb 20;13:RP96617. doi: 10.7554/eLife.96617 (PMC11841988; doi:10.7554/eLife.96617)
Supplement: Figure 1—source data 1. [file elife-96617-fig1-data1.xlsx]

## Sheet: Sheet1
Identifier	Total HIV DNA (log copies/million cells)
	Months Post Detection of Viraemia			Months Post Treatment		At Peak Viral Load
	0	6	12	6	12
FRESH_002	3.11262	2.27097	1.85877	1.7716	2.29776	3.11
FRESH_003	3.58655	-	2.75316	-	2.50406	3.59
FRESH_005	1.02623	1.59431	-	1.53462	1.53403	3.38
FRESH_004	2.07789	1.86328	2.55909	-	-	3.25
FRESH_010	3.37639	2.50379	2.17609	-	1.86629	1.52
FRESH_011	2.66626	2.77924	2.81976	1.81177	2.11193	2.62
FRESH_007	3.25339	-	2.90823	2.36572	2.85132	2.05
FRESH_013	1.51851	1.44716	1.74036	-	1.02938	1.03
FRESH_009	-	-	-	2.24762	2.27989	2.08
FRESH_008	2.62293	2.03543	-	1.25924	1.67943	2.67
FRESH_012	2.05239	-	2.2808	2.23661	1.7767	-
FRESH_015	2.03621	1.59731	1.93968	-	-	2.03621
FRESH_018	2.68124	2.02531	0.90309	-	-	-
FRESH_016	2.23657	-	1.78533	-	-	-
FRESH_029	2.2896	1.64637	1.27003	-	-	2.23657
FRESH_019	1.59261	-	1.07495	-	-	2.2896
FRESH_033	2.05955	-	1.80154	-	-	1.59261
FRESH_022	1.68561	1.99425	1.84391	-	-	2.05955
FRESH_025	3.77244	-	2.74849	-	-	-
FRESH_024	1.77314	-	1.70443	-	-	1.68561
FRESH_030	2.1211	1.30408	1.75203	-	-	3.77244
FRESH_023	1.6073	-	1.8819	-	-	1.77314
FRESH_036	1.87452	1.54516	1.53055	-	-	2.09963
FRESH_031	1.17609	1.88081	1.5486	-	-	1.6073
FRESH_038	1.86296	1.67075	1.63358	-	-	1.87452
FRESH_028	1.90833	-	1.92628	-	-	1.17609
FRESH_035	1.9472	-	1.51641	-	-	1.86296
FRESH_032	3.2786	2.41145	1.91466	-	-	1.9472
FRESH_034	2.61805	2.49621	1.21645	-	-	3.2786
FRESH_039	1.89963	1.76828	1.47952	-	-	1.96257
FRESH_048	1.75696	1.65659	1.76133	-	-	1.89963
FRESH_041	-	-	-	-	-	1.75696
FRESH_046	1.80688	-	1.51215	-	-	1.80688
FRESH_042	2.45666	-	1.46155	-	-	2.45666
FRESH_044	2.39577	-	2.15739	-	-	2.39577
